# Supplementary material for: Transient silencing of the KASII genes is feasible in Nicotiana benthamiana for metabolic engineering of wax ester composition
Source: PubMed Central journal article supplement (PMC4463015; doi:10.1038/srep11213), 2015-06-11
Supplement: srep11213-s1.pdf [file srep11213-s1.pdf]

## Supplementary information

### **Transient silencing of the *KASII* genes is feasible in *Nicotiana benthamiana* for metabolic engineering of wax ester composition**

Selcuk Aslan<sup>1</sup>, Per Hofvander<sup>2</sup>, Paresh Dutta<sup>3</sup>, Folke Sitbon<sup>1</sup>, Chuanxin Sun<sup>1\*</sup>

<sup>1</sup>Department of Plant Biology, Uppsala BioCenter, Linnean Centre for Plant Biology, Swedish University of Agricultural Sciences (SLU), Uppsala, Sweden

<sup>2</sup>Department of Plant Breeding, Swedish University of Agricultural Sciences (SLU), Alnarp, Sweden

<sup>3</sup>Department of Food Science, Uppsala BioCenter, Swedish University of Agricultural Sciences (SLU), Uppsala, Sweden

\*Correspondence

Email addresses:

[chuanxin.sun@slu.se](mailto:chuanxin.sun@slu.se)

**Table S1.** Palmitoyl (C16) and stearoyl (C18) compounds in wax esters, triacylglycerols, and free fatty alcohols in different combinations after agroinfiltration in *Nicotiana benthamiana* leaves. Note: The corresponding control is described as in Figure 2c.

| Combinations                      | Wax esters (nmol/mg of FW) |               |               |               |               |               |
|-----------------------------------|----------------------------|---------------|---------------|---------------|---------------|---------------|
|                                   | 16.0                       | 18.0          | 18.1          | 18.2          | 18.3          | Total 18      |
| Control                           | 0.015 ± 0.002              | 0.011 ± 0.006 | 0.003 ± 0.001 | 0.017 ± 0.002 | 0.008 ± 0.002 | 0.038 ± 0.011 |
| <i>KASIIRNAi-1</i>                | 0.036 ± 0.002              | 0.011 ± 0.001 | 0.002 ± 0.001 | 0.002 ± 0.001 | 0.035 ± 0.004 | 0.050 ± 0.007 |
| <i>KASIIRNAi-2</i>                | 0.036 ± 0.006              | 0.009 ± 0.003 | 0.004 ± 0.003 | 0.002 ± 0.001 | 0.025 ± 0.010 | 0.040 ± 0.016 |
| <i>KASIIRNAi-3</i>                | 0.034 ± 0.003              | 0.006 ± 0.000 | 0.002 ± 0.000 | 0.002 ± 0.000 | 0.020 ± 0.017 | 0.030 ± 0.018 |
| <i>AtFAR6+AtPES2</i>              | 0.073 ± 0.012              | 0.012 ± 0.005 | 0.002 ± 0.000 | 0.063 ± 0.021 | 0.067 ± 0.016 | 0.153 ± 0.042 |
| <i>AtFAR6+AtPES2+KASIIRNAi-1</i>  | 0.108 ± 0.013              | 0.027 ± 0.005 | 0.004 ± 0.001 | 0.055 ± 0.007 | 0.057 ± 0.002 | 0.143 ± 0.015 |
| <i>AtFAR6+AtPES2+KASIIRNAi-2</i>  | 0.115 ± 0.020              | 0.027 ± 0.003 | 0.006 ± 0.002 | 0.037 ± 0.012 | 0.027 ± 0.003 | 0.097 ± 0.020 |
| <i>AtFAR6+AtPES2+KASIIRNAi-3</i>  | 0.126 ± 0.013              | 0.013 ± 0.007 | 0.004 ± 0.001 | 0.022 ± 0.001 | 0.034 ± 0.005 | 0.073 ± 0.014 |
| <i>tpMaFAR+AtPES2</i>             | 0.224 ± 0.064              | 0.024 ± 0.004 | 0.004 ± 0.000 | 0.043 ± 0.002 | 0.054 ± 0.003 | 0.125 ± 0.009 |
| <i>tpMaFAR+AtPES2+KASIIRNAi-1</i> | 0.257 ± 0.015              | 0.026 ± 0.002 | 0.004 ± 0.001 | 0.022 ± 0.013 | 0.037 ± 0.015 | 0.090 ± 0.031 |
| <i>tpMaFAR+AtPES2+KASIIRNAi-2</i> | 0.210 ± 0.038              | 0.040 ± 0.027 | 0.006 ± 0.001 | 0.008 ± 0.003 | 0.015 ± 0.007 | 0.070 ± 0.038 |
| <i>tpMaFAR+AtPES2+KASIIRNAi-3</i> | 0.260 ± 0.029              | 0.026 ± 0.005 | 0.005 ± 0.001 | 0.024 ± 0.007 | 0.030 ± 0.016 | 0.086 ± 0.029 |

**Table S1.** Continued.

| Combinations                      | Triacylglycerols (nmol/mg FW) |               |               |               |               |               |
|-----------------------------------|-------------------------------|---------------|---------------|---------------|---------------|---------------|
|                                   | 16.0                          | 18.0          | 18.1          | 18.2          | 18.3          | Total 18      |
| Control                           | 0.041 ± 0.010                 | 0.009 ± 0.001 | 0.002 ± 0.001 | 0.019 ± 0.008 | 0.045 ± 0.014 | 0.075 ± 0.024 |
| <i>KASIIRNAi-1</i>                | 0.083 ± 0.031                 | 0.014 ± 0.003 | 0.001 ± 0.000 | 0.038 ± 0.019 | 0.095 ± 0.044 | 0.148 ± 0.067 |
| <i>KASIIRNAi-2</i>                | 0.081 ± 0.014                 | 0.016 ± 0.007 | 0.001 ± 0.001 | 0.030 ± 0.006 | 0.080 ± 0.016 | 0.127 ± 0.030 |
| <i>KASIIRNAi-3</i>                | 0.089 ± 0.022                 | 0.014 ± 0.004 | 0.001 ± 0.000 | 0.030 ± 0.009 | 0.089 ± 0.028 | 0.134 ± 0.042 |
| <i>AtFAR6+AtPES2</i>              | 0.146 ± 0.052                 | 0.024 ± 0.009 | 0.001 ± 0.000 | 0.033 ± 0.013 | 0.088 ± 0.036 | 0.146 ± 0.058 |
| <i>AtFAR6+AtPES2+KASIIRNAi-1</i>  | 0.179 ± 0.041                 | 0.024 ± 0.007 | 0.001 ± 0.000 | 0.033 ± 0.007 | 0.105 ± 0.014 | 0.163 ± 0.027 |
| <i>AtFAR6+AtPES2+KASIIRNAi-2</i>  | 0.156 ± 0.042                 | 0.017 ± 0.005 | 0.001 ± 0.000 | 0.028 ± 0.010 | 0.097 ± 0.015 | 0.143 ± 0.031 |
| <i>AtFAR6+AtPES2+KASIIRNAi-3</i>  | 0.208 ± 0.084                 | 0.019 ± 0.007 | 0.001 ± 0.000 | 0.030 ± 0.012 | 0.106 ± 0.043 | 0.156 ± 0.062 |
| <i>tpMaFAR+AtPES2</i>             | 0.210 ± 0.017                 | 0.035 ± 0.001 | 0.002 ± 0.001 | 0.036 ± 0.004 | 0.125 ± 0.019 | 0.198 ± 0.026 |
| <i>tpMaFAR+AtPES2+KASIIRNAi-1</i> | 0.130 ± 0.018                 | 0.021 ± 0.004 | 0.001 ± 0.000 | 0.020 ± 0.002 | 0.078 ± 0.007 | 0.119 ± 0.013 |
| <i>tpMaFAR+AtPES2+KASIIRNAi-2</i> | 0.173 ± 0.040                 | 0.024 ± 0.007 | 0.002 ± 0.001 | 0.025 ± 0.006 | 0.101 ± 0.027 | 0.152 ± 0.041 |
| <i>tpMaFAR+AtPES2+KASIIRNAi-3</i> | 0.197 ± 0.070                 | 0.025 ± 0.009 | 0.002 ± 0.001 | 0.028 ± 0.010 | 0.111 ± 0.040 | 0.166 ± 0.060 |

**Free fatty alcohols (nmol/mg FW)**

| Combinations                      | 16:0-OH       | 18:0-OH       |
|-----------------------------------|---------------|---------------|
| Control                           | 0.004 ± 0.002 | 0.008 ± 0.001 |
| <i>KASIIRNAi-1</i>                | 0.002 ± 0.000 | 0.002 ± 0.000 |
| <i>KASIIRNAi-2</i>                | 0.002 ± 0.001 | 0.002 ± 0.000 |
| <i>KASIIRNAi-3</i>                | 0.002 ± 0.000 | 0.002 ± 0.000 |
| <i>AtFAR6+AtPES2</i>              | 0.055 ± 0.013 | 0.011 ± 0.001 |
| <i>AtFAR6+AtPES2+KASIIRNAi-1</i>  | 0.062 ± 0.019 | 0.016 ± 0.002 |
| <i>AtFAR6+AtPES2+KASIIRNAi-2</i>  | 0.054 ± 0.016 | 0.012 ± 0.002 |
| <i>AtFAR6+AtPES2+KASIIRNAi-3</i>  | 0.060 ± 0.005 | 0.015 ± 0.001 |
| <i>tpMaFAR+AtPES2</i>             | 0.099 ± 0.017 | 0.083 ± 0.011 |
| <i>tpMaFAR+AtPES2+KASIIRNAi-1</i> | 0.122 ± 0.017 | 0.096 ± 0.009 |
| <i>tpMaFAR+AtPES2+KASIIRNAi-2</i> | 0.089 ± 0.028 | 0.073 ± 0.026 |
| <i>tpMaFAR+AtPES2+KASIIRNAi-3</i> | 0.114 ± 0.025 | 0.104 ± 0.013 |

Transient silencing of the *KASII* genes is feasible in *Nicotiana benthamiana* for metabolic engineering of wax ester compositions - Aslan *et al* 2015 - Tables S1 and S2

**Table S2.** Oligonucleotides used in this study.

| Primers used for construction of <i>KASIIRNAi</i> . |         |                                     |                                       |
|-----------------------------------------------------|---------|-------------------------------------|---------------------------------------|
| Construct                                           | Primer  | Sequence 5'→3'                      |                                       |
| <i>KASIIRNAi-1</i>                                  | Forward | AAATCTAGAGATTTGATTTTTGATTGAAA       |                                       |
|                                                     | Reverse | AAAGGATCCTCCCGGTCACAACCACTCGC       |                                       |
| <i>KASIIRNAi-1</i>                                  | Forward | AAAGAGCTCCTCGAGGATTTGATTTTTGATTGAAA |                                       |
|                                                     | Reverse | AAAGGTACCTCCCGGTCACAACCACTCGC       |                                       |
| <i>KASIIRNAi-2</i>                                  | Forward | AAA TCTAGAGGGTTCAACATGCATGTCAG      |                                       |
|                                                     | Reverse | AAAGGATCCGCAACCCAGCCATCAGTCGA       |                                       |
| <i>KASIIRNAi-2</i>                                  | Forward | AAAGAGCTCCTCGAGGGGTTCAACATGCATGTCAG |                                       |
|                                                     | Reverse | AAAGGTACCGCAACCCAGCCATCAGTCGA       |                                       |
| <i>KASIIRNAi-3</i>                                  | Forward | AAATCTAGAATGTGGAGTTTTAATTGGCT       |                                       |
|                                                     | Reverse | AAAGGATCCATTCAAACCTAGAAATTCAGC      |                                       |
| <i>KASIIRNAi-3</i>                                  | Forward | AAAGAGCTCGTCGACATGTGGAGTTTTAATTGGCT |                                       |
|                                                     | Reverse | TTTGGTACCCTTCGATCTAGAAATTCAGC       |                                       |
| Primers used for qRT-PCR analysis                   |         |                                     |                                       |
| Gene                                                | Primer  | Sequence 5'→3'                      | Reference/Acc. No.                    |
| <i>Actin</i>                                        | Forward | TCCTGATGGGCAAGTGATTAC               | Liu and Shi et al. 2012 <sup>49</sup> |
|                                                     | Reverse | TTGTATGTGGTCTCGTGGATTC              |                                       |
| <i>FAR6</i>                                         | Forward | TCACTTCTGCTTTATCGAACAC<br>A         | At3g56700                             |
|                                                     | Reverse | CTCTTCCCTTCGTGCTCAA                 |                                       |
| <i>tpMaFAR</i>                                      | Forward | CCTGACGGATCGTGTCTG                  | YP_959486                             |
|                                                     | Reverse | GACTGCGTGGTATCCAGGTT                |                                       |

Transient silencing of the *KASII* genes is feasible in *Nicotiana benthamiana* for metabolic engineering of wax ester compositions - Aslan *et al* 2015 - Tables S1 and S2

**Table S2.** Continued.

|                                                         |         |                             |           |
|---------------------------------------------------------|---------|-----------------------------|-----------|
| <i>PES2</i>                                             | Forward | TGGAAAAGGCAACAAAGGAC        | At3g26840 |
|                                                         | Reverse | TTTCCCAATTCGCTCTCATC        |           |
| <i>KASII</i> after<br><i>KASIRNAi-1</i><br>inhibition   | Forward | TGGATTTGTCATGGGTGAAG        | This work |
|                                                         | Reverse | TTGGCATGCTCAAGTTCTTCT       | This work |
| <i>KASII</i> after<br><i>KASIRNAi-2/3</i><br>inhibition | Forward | TCCACAAAATCTATGATTGGTC<br>A | This work |
